# Supplementary material for: Prognostic Value of Late Gadolinium Enhancement Cardiovascular Magnetic Resonance in Cardiac Amyloidosis
Source: PubMed Central journal article supplement (PMC4606985; doi:10.1161/circulationaha.115.016567), 2015-10-19

**SUPPLEMENTAL MATERIAL**

**Supplemental Figure 1.** Consort diagram.

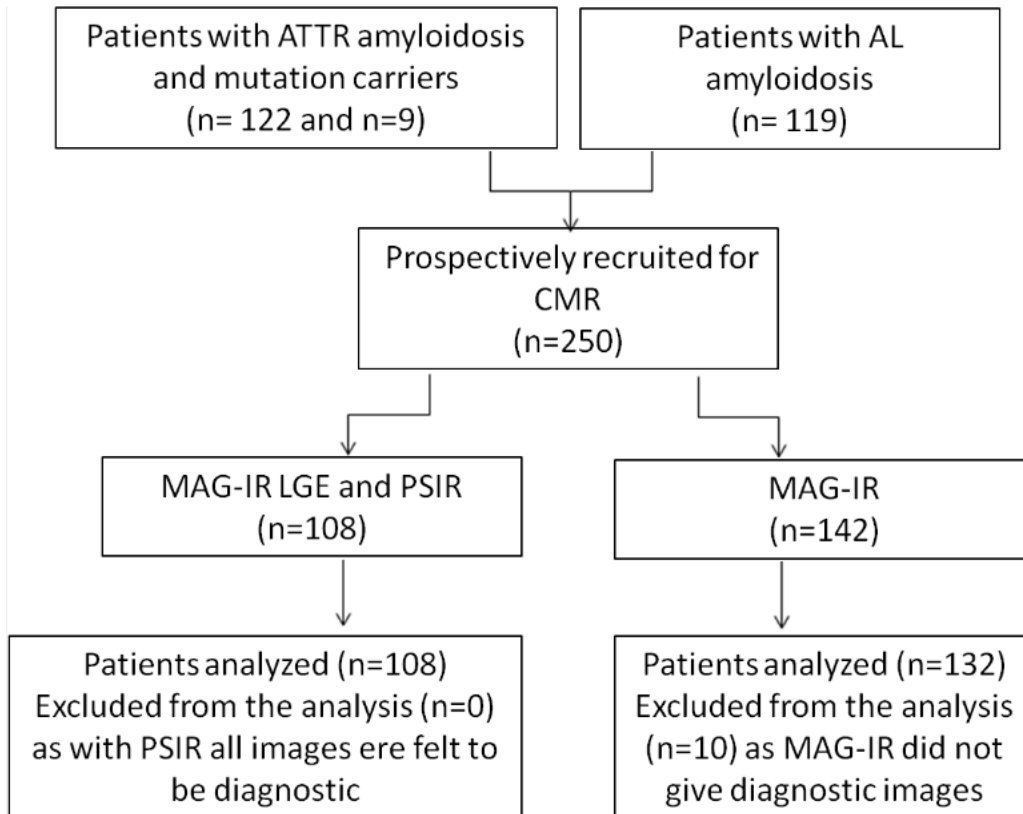

Supplement: cir-132-1570-s002.pdf [file cir-132-1570-s002.pdf]
